# Supplementary material
Source: PubMed Central journal article supplement (PMC4360180)
Supplement: supp_dev.113431_DEV113431supp.pdf [file supp_dev.113431_DEV113431supp.pdf]

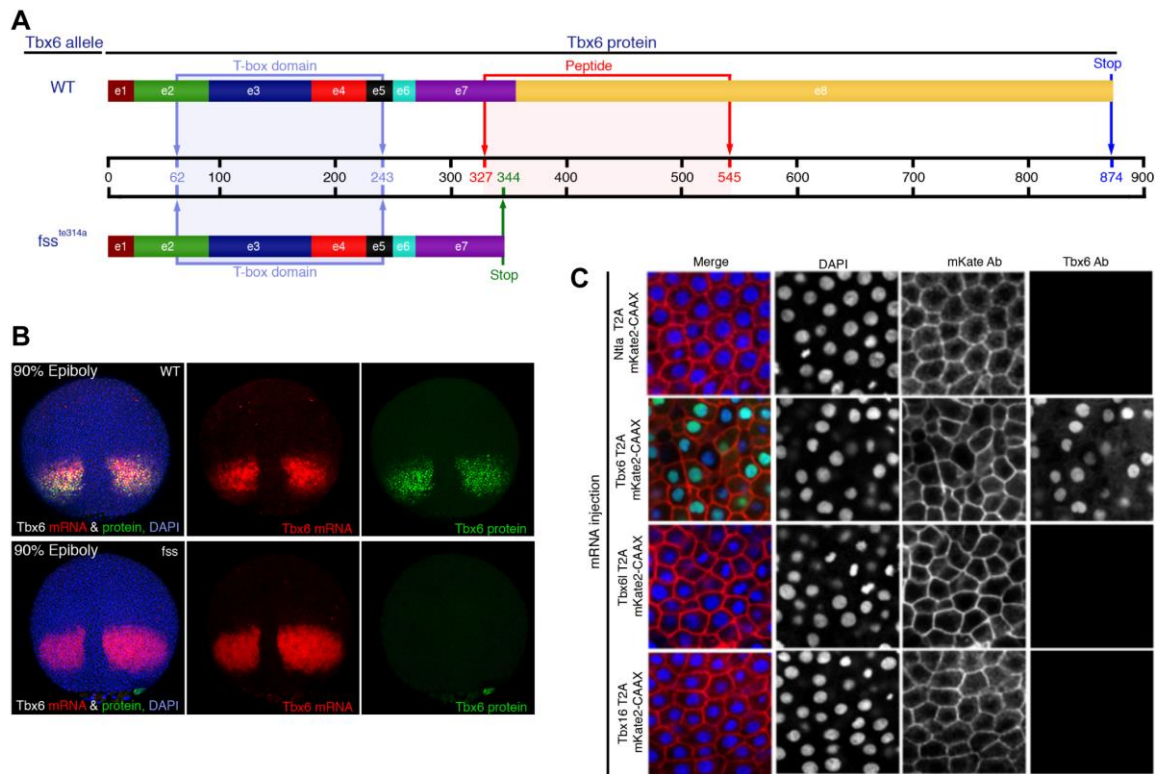

**Figure S1. Tbx6 antibody-binding specificity.** (A) Graphical representation of the full-length Tbx6 protein in wild-type embryos, and the truncated Tbx6 protein in *tbx6* mutants. All eight exons are depicted in different colors. The blue arrows represent the predicted T-box domain from amino acid 62 to 243. The sequence chosen to generate the Tbx6 antibody is highlighted in red, spanning the region from amino acid 327 to 545. (B) Representative example showing *tbx6* mRNA and protein expression patterns in wild type and in *tbx6* mutants at 90% epiboly. Immunolabeling using the Tbx6 antibody was followed by *in situ* hybridization using a *tbx6* probe and the Fast Red reaction (Roche) (C) Immunolabeling using Tbx6 (green) and tRFP (red fluorescent protein mKate2) antibodies. Animal poles of *tbx6* mutant embryos 4 hours post fertilization, injected at the 1-cell-stage with capped mRNAs (generated using the Tol2 kit and the mMessage kit, Ambion): *Ntla-T2A-mKate2CAAX*, *Tbx6-T2A-mKate2CAAX*, *Tbx6l-T2A-mKate2CAAX* or *Tbx16-T2A-mKate2CAAX*. The Tbx6 antibody only binds in embryos injected with *tbx6* mRNA. Embryos were imaged with a Zeiss LSM 780 and confocal *z*-stacks were flattened.

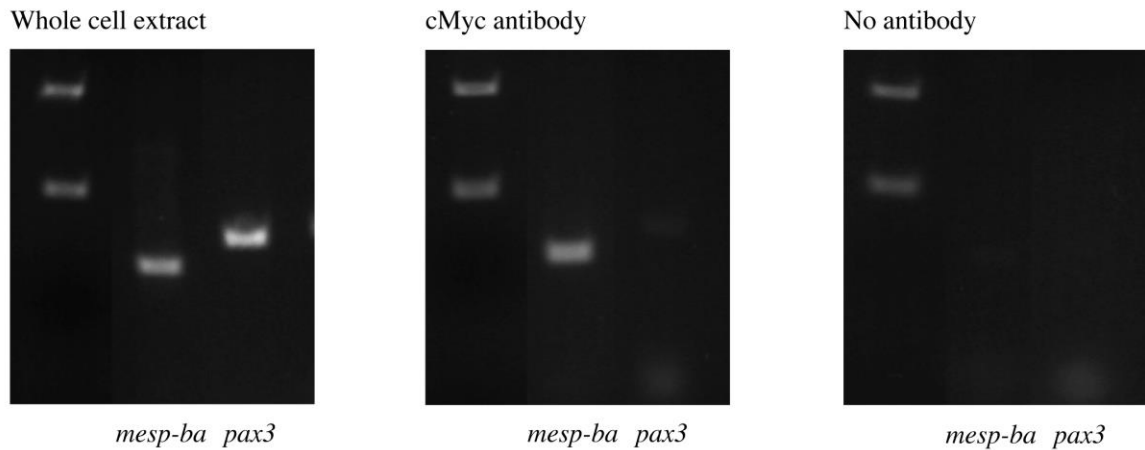

**Figure S2. ChIP-PCR confirming Tbx6<sup>Myc</sup> binding approximately 6700 bp upstream of the *mesp-ba* transcriptional start site (peak 16075430-16075735).** *Tg(hsp70l:tbx6<sup>myc</sup>)* and wild-type embryos were heat-shocked, fixed and extracted as for ChIP-Seq. The extract was immunoprecipitated using the Myc epitope antibody (9B11, Cell Signaling Technology), as in Martins-Taylor et al. (2011). The DNA isolated by ChIP was amplified using the following primers: *mesp-ba* 5'-AATGGTAGTCAGGCAGAAGTG-3', 5'-CTGCAGCAAGTTGCCTTACAG-3'; *pax3* 5'-AGTAGTATCGCCCGGTCTTCTC-3', 5'-CCTGAGGGACAAAACATC-3'. Specificity of Tbx6<sup>Myc</sup> binding was confirmed, as DNA upstream of the *pax3* gene is not pulled down using a Myc antibody, serving as a negative control, whereas a no-Myc-antibody control fails to immunoprecipitate DNA from upstream both of *mesp-ba* and *pax3*. Peak 16082055-16082560 was confirmed by Kawamura et al. (2008), using the following primers: 5'-CAACAAACACAAAAAGCACACGTT-3', 5'-GGTGAAAGGAGGATGGAGGTTTAT-3'.

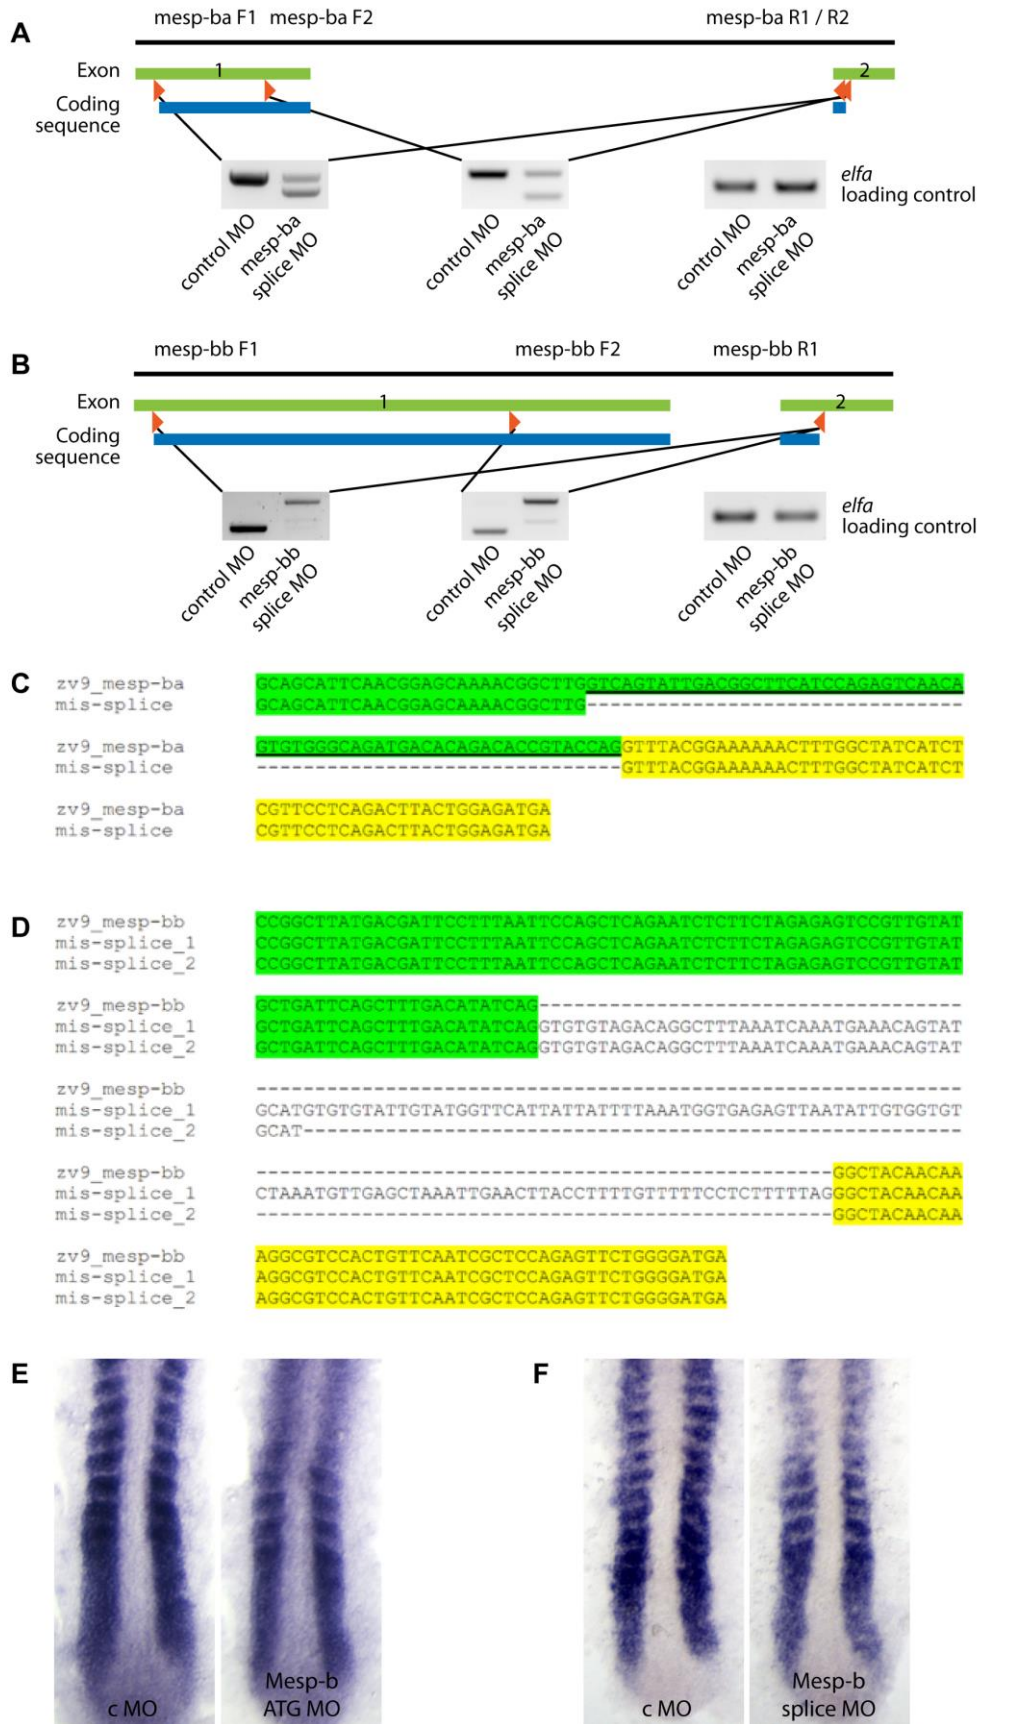

**Figure S3. Mesp-b MO validation.** (A,B) Mesp-ba (A) and Mesp-bb (B) splice morpholino transcript schematics and PCR primers are shown on top, the RT-PCR of

injected embryos is shown below. (C) Green highlight - 3' part of *Zv9 mesp-ba* exon 1; Yellow highlight - *Zv9 mesp-ba* exon 2 (until stop codon, excluding 3' UTR); Underlined - Sequence missing from *mesp-ba* mis-splice product. (D) Green highlight - 3' part of *Zv9 mesp-bb* exon 1; Yellow highlight - *Zv9 mesp-bb* exon 2 (until stop codon, excluding 3' UTR). Mis-splice\_1 is the larger product, mis-splice\_2 the smaller product shown in (B). (E,F) In situ hybridization for *meox1* mRNA in control and *Mesp-b* MO-treated embryos. *Mesp-b* ATG MOs and *Mesp-b* splice MOs cause similar reduction of *meox1* expression in maturing somites.

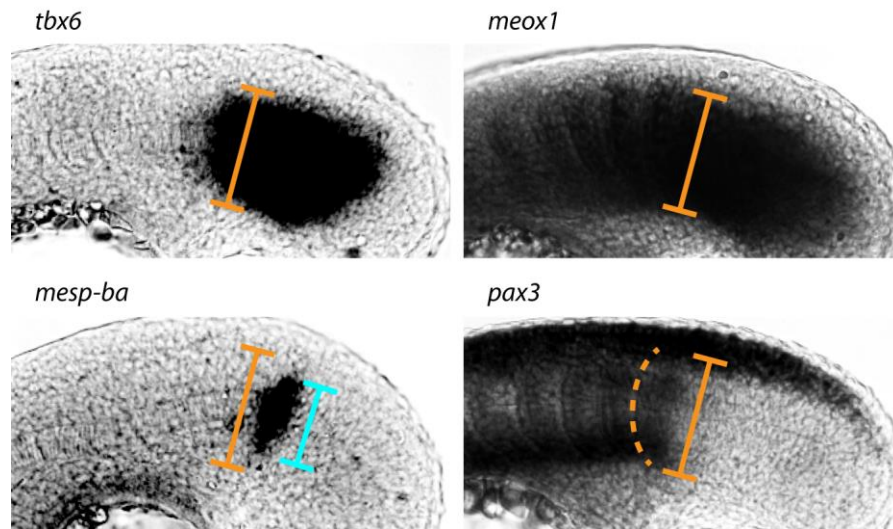

**Figure S4. Expression of *tbx6*, *meox1*, *mesp-ba* and *pax3* mRNA.** Expression of *tbx6*, *meox1* and *pax3* spans the entire dorsal-ventral extent of the paraxial mesoderm (orange brackets). *mesp-ba* mRNA is highly expressed in the central region (blue bracket) but not detectable in the peripheral portions of the presomitic paraxial mesoderm. Dashed line indicates most recently formed somite boundary.

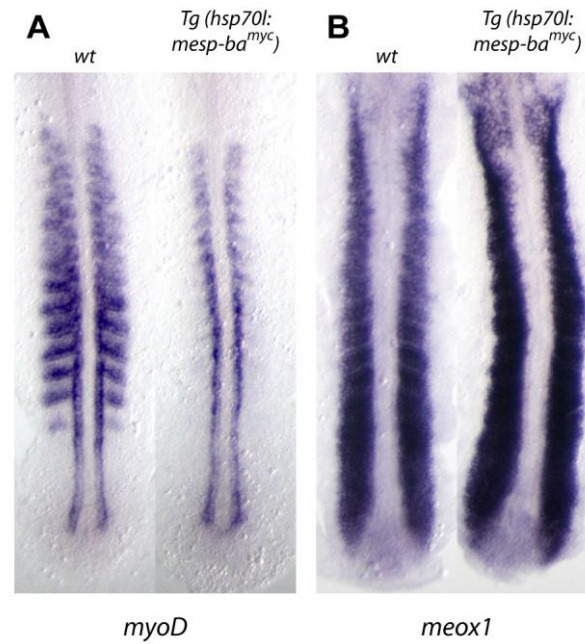

**Figure S5. Ubiquitous Mesp-ba expression immediately changes *myoD* and *meox1* mRNA levels.** *In situ* hybridization for *myoD* (C) and *meox1* (D) in wild-type (left side) and *Tg(hsp70l:mesp-ba<sup>myc</sup>)* embryos (right side) 15 minutes after the end of a 1-h heat shock. *myoD* is downregulated and *meox1* is upregulated in the lateral paraxial mesoderm.



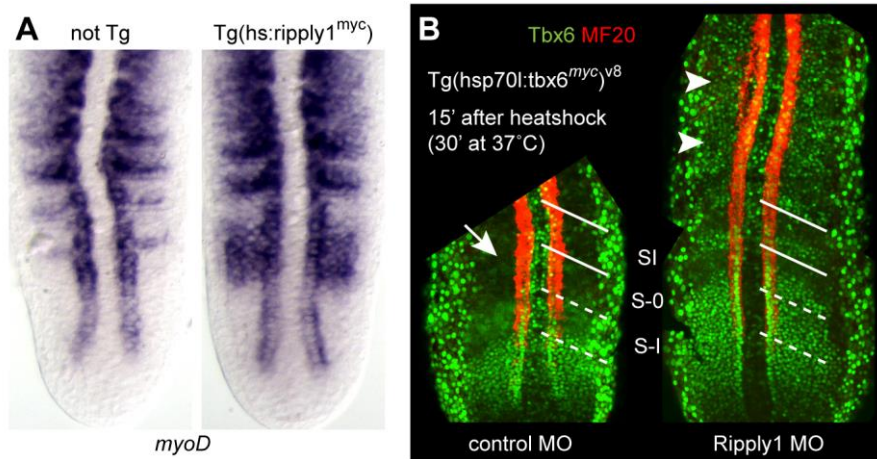

**Figure S6. Ripply1 regulates Tbx6 function.** (A) *In situ* hybridization for *myoD* in wild-type embryos and *Tg(hsp70l:rippy1<sup>myc</sup>)* siblings after a series of three heat shocks (30 minutes each, followed by 30-minute breaks). Ubiquitous expression of Ripply1 leads to an increase of *myoD* expression in the anterior presomitic mesoderm. (B) *Tg(hsp70l:tbx6<sup>myc.v8</sup>)* embryos, injected with control (left) or Ripply1 MOs (right); heat-shocked at the 10S stage for 30 minutes and fixed 15 minutes after the end of heatshock treatment. Immunolabeling shows expression of Tbx6 (green) and myosin heavy chain (MF20, red). Immediately after ubiquitous Tbx6<sup>Myc</sup> expression, Tbx6 protein is cleared from the paraxial mesoderm in control but not in Ripply1 MO-treated embryos.

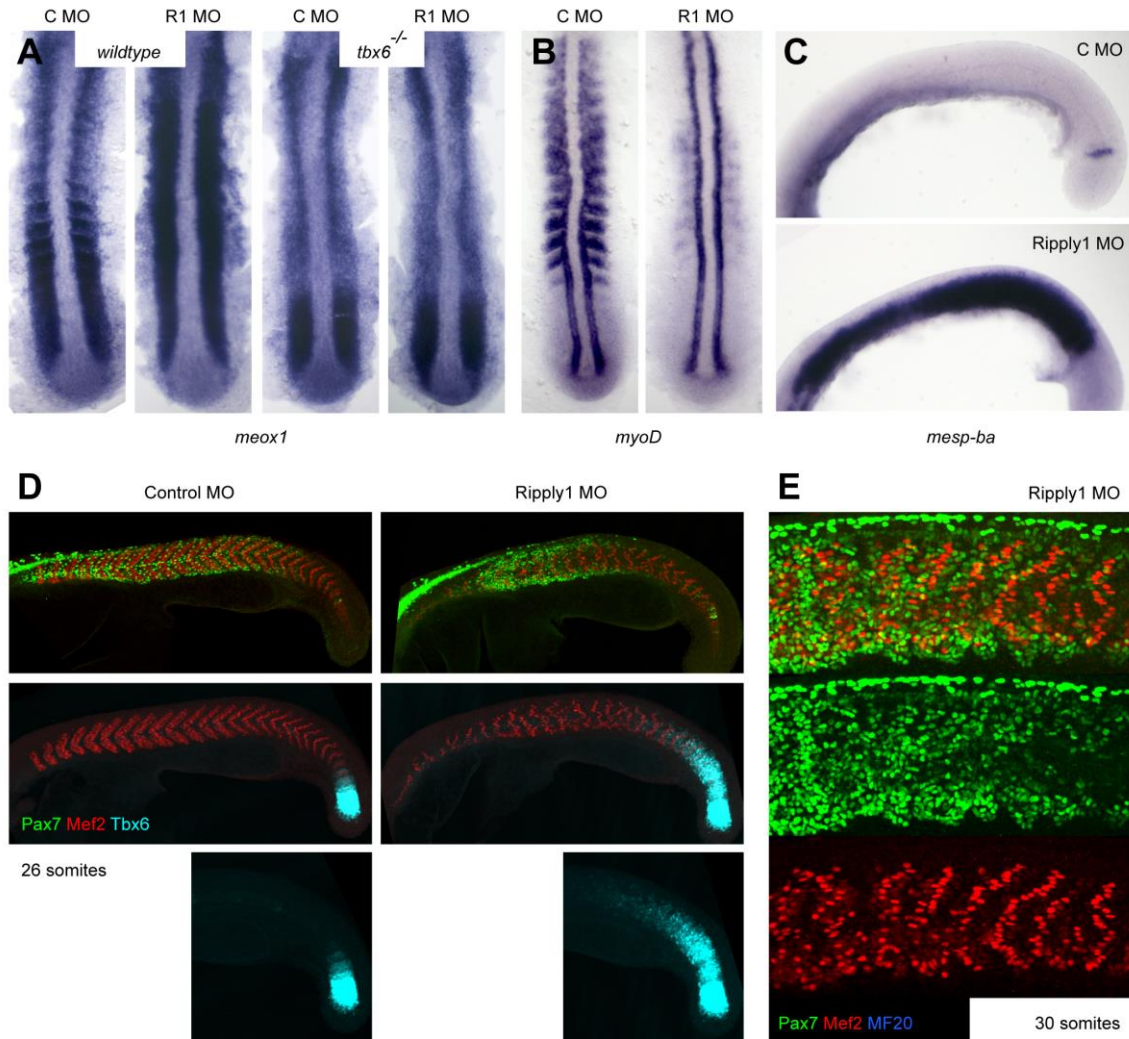

**Figure S7. Knockdown of Ripply1 promotes dermomyotome development at the expense of primary fast myotome primary fast muscle formation but delays maturation.** (A-C) *In situ* hybridization for *meox1* (A), *myoD* (B) and *mesp-ba* (C) in control MO and Ripply1 MO-injected embryos during segmentation. Note that Ripply1 MO treatment shows no effects in *tbx6* mutants. (D,E) Immunolabeling in Ripply1 MO- and control MO-treated embryos. (D) Comparison of Pax7 (green) and Tbx6 expression (cyan) in embryos at the 26S stage. Myonuclei are labeled with Mef2 (red). (E) Ripply1 morphant showing that the onset of Pax7 expression (green) spatially correlates with the appearance of the first primary fast myotome cells (Mef2, faint red). Slow fiber nuclei express Mef2 (bright) before the maturation of the dermomyotome.



**Table S1. ChIP-Seq.** Tables listing the positions of significant peaks identified in duplicate anti-Myc immunoprecipitation experiments from *Tg(hsp70l:tbx6<sup>myc</sup>)* embryos 1 h after heat shock treatment (see Fig. 1F), and corresponding gene positions.

| Chromosome  | Peak start      | Peak stop       | Peak size | Proximal gene        |
|-------------|-----------------|-----------------|-----------|----------------------|
| chr7        | 16074838        | 16075110        | 273       | <i>mespba;mespaa</i> |
| <b>chr7</b> | <b>16075430</b> | <b>16075735</b> | 306       | <i>mespba;mespaa</i> |
| chr7        | 16077395        | 16077604        | 210       | <i>mespba;mespaa</i> |
| <b>chr7</b> | <b>16082055</b> | <b>16082560</b> | 506       | <i>mespaa;mespba</i> |
| chr21       | 36933621        | 36934092        | 472       | <i>mespbb;mespab</i> |
| chr21       | 36935687        | 36936177        | 491       | <i>mespbb;mespab</i> |
| chr21       | 36936989        | 36937357        | 369       | <i>mespbb;mespab</i> |
| chr21       | 36951345        | 36951918        | 574       | <i>mespbb;mespab</i> |
| chr21       | 36952555        | 36952924        | 370       | <i>mespbb;mespab</i> |
| chr21       | 36958013        | 36958556        | 544       | <i>mespbb;mespab</i> |
| chr21       | 36960812        | 36961218        | 407       | <i>mespbb;mespab</i> |
| chr25       | 11386856        | 11387147        | 292       | <i>rippy1</i>        |
| chr25       | 11386856        | 11387147        | 292       | <i>rippy1</i>        |
| chr25       | 11389407        | 11389883        | 477       | <i>rippy1</i>        |
| chr25       | 11393143        | 11393773        | 631       | <i>rippy1</i>        |
| chr25       | 11396259        | 11396835        | 577       | <i>rippy1</i>        |
| chr25       | 11398508        | 11398877        | 370       | <i>rippy1</i>        |
| chr25       | 11400599        | 11401158        | 560       | <i>rippy1</i>        |

| Gene name     | Chromosome | Gene start | Gene stop | Strand |
|---------------|------------|------------|-----------|--------|
| <i>mespaa</i> | chr7       | 16098653   | 16101163  | 1      |
| <i>mespba</i> | chr7       | 16082277   | 16085567  | 1      |
| <i>mespab</i> | chr25      | 11382068   | 11383326  | -1     |
| <i>mespbb</i> | chr25      | 11392554   | 11393558  | -1     |
| <i>rippy1</i> | chr21      | 36930713   | 36937075  | -1     |

**Table S2. Location of potential T-boxes within genomic regions represented in Figure 1F.**

All Tboxes of >50% of the maximum possible score relative to the motif identified in this study are shown (see Materials and Methods). Whether each sequence is located under a ChIP-seq peak is indicated.

| Chromosome | Region start | Region end | Tbox start | Tbox end | Tbox strand | % of max. score | Sequence | Under ChIP-seq peak |
|------------|--------------|------------|------------|----------|-------------|-----------------|----------|---------------------|
| 7          | 16069000     | 16104000   | 16070479   | 16070486 | +           | 59.2            | TCACACAC |                     |
| 7          | 16069000     | 16104000   | 16070660   | 16070667 | -           | 54.8            | TCACAGCA |                     |
| 7          | 16069000     | 16104000   | 16071406   | 16071413 | -           | 54.8            | TCACAGCA |                     |
| 7          | 16069000     | 16104000   | 16071516   | 16071523 | -           | 61.5            | TCACACTA |                     |
| 7          | 16069000     | 16104000   | 16071869   | 16071876 | -           | 83.3            | TCACACTT |                     |
| 7          | 16069000     | 16104000   | 16072717   | 16072724 | -           | 57.3            | TGACACCA |                     |
| 7          | 16069000     | 16104000   | 16074474   | 16074481 | +           | 54.8            | TCACAGCA |                     |
| 7          | 16069000     | 16104000   | 16075011   | 16075018 | +           | 100.0           | TCACACCT | *                   |
| 7          | 16069000     | 16104000   | 16075046   | 16075053 | -           | 100.0           | TCACACCT | *                   |
| 7          | 16069000     | 16104000   | 16075312   | 16075319 | -           | 100.0           | TCACACCT |                     |
| 7          | 16069000     | 16104000   | 16075592   | 16075599 | +           | 61.5            | TCACACTA | *                   |
| 7          | 16069000     | 16104000   | 16077272   | 16077279 | -           | 72.0            | TCACATCT |                     |
| 7          | 16069000     | 16104000   | 16077486   | 16077493 | -           | 59.0            | TCACACAA | *                   |
| 7          | 16069000     | 16104000   | 16077497   | 16077504 | +           | 100.0           | TCACACCT | *                   |
| 7          | 16069000     | 16104000   | 16077744   | 16077751 | -           | 55.4            | TCACATTT |                     |
| 7          | 16069000     | 16104000   | 16078528   | 16078535 | +           | 60.5            | ACACACTT |                     |
| 7          | 16069000     | 16104000   | 16078566   | 16078573 | +           | 56.4            | AGACACCT |                     |
| 7          | 16069000     | 16104000   | 16078600   | 16078607 | +           | 58.1            | ACACACAT |                     |
| 7          | 16069000     | 16104000   | 16078629   | 16078636 | +           | 58.1            | ACACACAT |                     |
| 7          | 16069000     | 16104000   | 16079062   | 16079069 | -           | 60.0            | TCACAGTT |                     |
| 7          | 16069000     | 16104000   | 16079666   | 16079673 | +           | 83.3            | TCACACTT |                     |
| 7          | 16069000     | 16104000   | 16080777   | 16080784 | +           | 55.4            | TCACATTT |                     |
| 7          | 16069000     | 16104000   | 16082207   | 16082214 | +           | 100.0           | TCACACCT | *                   |
| 7          | 16069000     | 16104000   | 16082307   | 16082314 | -           | 79.2            | TGACACCT | *                   |
| 7          | 16069000     | 16104000   | 16082310   | 16082317 | +           | 55.2            | TGTCACCT | *                   |
| 7          | 16069000     | 16104000   | 16082740   | 16082747 | +           | 52.6            | TCTCAGCT |                     |
| 7          | 16069000     | 16104000   | 16083275   | 16083282 | +           | 55.3            | ACACACCA |                     |
| 7          | 16069000     | 16104000   | 16083386   | 16083393 | -           | 60.1            | TGACACAT |                     |
| 7          | 16069000     | 16104000   | 16084350   | 16084357 | -           | 58.1            | ACACACAT |                     |
| 7          | 16069000     | 16104000   | 16084624   | 16084631 | +           | 55.4            | TCACATTT |                     |
| 7          | 16069000     | 16104000   | 16084808   | 16084815 | -           | 79.2            | TGACACCT |                     |
| 7          | 16069000     | 16104000   | 16084871   | 16084878 | +           | 77.2            | ACACACCT |                     |
| 7          | 16069000     | 16104000   | 16084924   | 16084931 | -           | 60.5            | ACACACTT |                     |
| 7          | 16069000     | 16104000   | 16085135   | 16085142 | +           | 51.3            | TGACATCT |                     |

|    |          |          |          |          |   |       |          |  |
|----|----------|----------|----------|----------|---|-------|----------|--|
| 7  | 16069000 | 16104000 | 16085366 | 16085373 | + | 78.1  | TCACACCA |  |
| 7  | 16069000 | 16104000 | 16086360 | 16086367 | - | 76.7  | TCACAGCT |  |
| 7  | 16069000 | 16104000 | 16088251 | 16088258 | + | 83.3  | TCACACTT |  |
| 7  | 16069000 | 16104000 | 16089113 | 16089120 | + | 80.9  | TCACACAT |  |
| 7  | 16069000 | 16104000 | 16089181 | 16089188 | - | 52.9  | TCACATAT |  |
| 7  | 16069000 | 16104000 | 16089327 | 16089334 | + | 77.2  | ACACACCT |  |
| 7  | 16069000 | 16104000 | 16089937 | 16089944 | - | 72.0  | TCACATCT |  |
| 7  | 16069000 | 16104000 | 16090015 | 16090022 | + | 78.1  | TCACACCA |  |
| 7  | 16069000 | 16104000 | 16090098 | 16090105 | - | 53.9  | ACACAGCT |  |
| 7  | 16069000 | 16104000 | 16090220 | 16090227 | + | 58.1  | ACACACAT |  |
| 7  | 16069000 | 16104000 | 16090266 | 16090273 | - | 80.9  | TCACACAT |  |
| 7  | 16069000 | 16104000 | 16091463 | 16091470 | + | 58.1  | ACACACAT |  |
| 7  | 16069000 | 16104000 | 16091896 | 16091903 | + | 80.9  | TCACACAT |  |
| 7  | 16069000 | 16104000 | 16092292 | 16092299 | + | 80.9  | TCACACAT |  |
| 7  | 16069000 | 16104000 | 16092376 | 16092383 | - | 83.3  | TCACACTT |  |
| 7  | 16069000 | 16104000 | 16092567 | 16092574 | + | 52.9  | TCACATAT |  |
| 7  | 16069000 | 16104000 | 16093663 | 16093670 | + | 100.0 | TCACACCT |  |
| 7  | 16069000 | 16104000 | 16093721 | 16093728 | + | 51.3  | TGACATCT |  |
| 7  | 16069000 | 16104000 | 16093753 | 16093760 | + | 57.3  | TGACACCA |  |
| 7  | 16069000 | 16104000 | 16094026 | 16094033 | - | 78.3  | TCACACCC |  |
| 7  | 16069000 | 16104000 | 16094395 | 16094402 | + | 55.3  | ACACACCA |  |
| 7  | 16069000 | 16104000 | 16094402 | 16094409 | - | 55.4  | TCACATTT |  |
| 7  | 16069000 | 16104000 | 16095140 | 16095147 | - | 53.9  | ACACAGCT |  |
| 7  | 16069000 | 16104000 | 16095370 | 16095377 | + | 55.3  | ACACACCA |  |
| 7  | 16069000 | 16104000 | 16095782 | 16095789 | + | 55.9  | TGACAGCT |  |
| 7  | 16069000 | 16104000 | 16096636 | 16096643 | + | 60.5  | ACACACTT |  |
| 7  | 16069000 | 16104000 | 16098455 | 16098462 | - | 80.9  | TCACACAT |  |
| 7  | 16069000 | 16104000 | 16098493 | 16098500 | + | 100.0 | TCACACCT |  |
| 7  | 16069000 | 16104000 | 16098980 | 16098987 | + | 54.1  | TCTCACCA |  |
| 7  | 16069000 | 16104000 | 16099252 | 16099259 | - | 77.2  | ACACACCT |  |
| 7  | 16069000 | 16104000 | 16099403 | 16099410 | - | 77.2  | ACACACCT |  |
| 7  | 16069000 | 16104000 | 16099559 | 16099566 | - | 77.2  | ACACACCT |  |
| 7  | 16069000 | 16104000 | 16099658 | 16099665 | - | 77.2  | ACACACCT |  |
| 7  | 16069000 | 16104000 | 16100250 | 16100257 | + | 80.9  | TCACACAT |  |
| 7  | 16069000 | 16104000 | 16101249 | 16101256 | + | 58.1  | ACACACAT |  |
| 7  | 16069000 | 16104000 | 16101319 | 16101326 | + | 55.4  | TCACATTT |  |
| 7  | 16069000 | 16104000 | 16102155 | 16102162 | + | 83.3  | TCACACTT |  |
| 7  | 16069000 | 16104000 | 16102503 | 16102510 | + | 62.5  | TGACACTT |  |
| 7  | 16069000 | 16104000 | 16102881 | 16102888 | - | 100.0 | TCACACCT |  |
| 7  | 16069000 | 16104000 | 16103051 | 16103058 | - | 75.9  | TCTCACCT |  |
| 7  | 16069000 | 16104000 | 16103084 | 16103091 | + | 53.9  | ACACAGCT |  |
| 21 | 36929000 | 36964000 | 36929777 | 36929784 | + | 53.9  | ACACAGCT |  |
| 21 | 36929000 | 36964000 | 36930193 | 36930200 | - | 55.4  | TCACATTT |  |
| 21 | 36929000 | 36964000 | 36930258 | 36930265 | + | 56.4  | AGACACCT |  |

|    |          |          |          |          |   |       |          |   |
|----|----------|----------|----------|----------|---|-------|----------|---|
| 21 | 36929000 | 36964000 | 36930669 | 36930676 | - | 83.3  | TCACACTT |   |
| 21 | 36929000 | 36964000 | 36930680 | 36930687 | - | 55.2  | TGTCACCT |   |
| 21 | 36929000 | 36964000 | 36931149 | 36931156 | - | 76.7  | TCACAGCT |   |
| 21 | 36929000 | 36964000 | 36931207 | 36931214 | + | 76.7  | TCACAGCT |   |
| 21 | 36929000 | 36964000 | 36931821 | 36931828 | + | 60.5  | ACACACTT |   |
| 21 | 36929000 | 36964000 | 36933115 | 36933122 | - | 58.1  | ACACACAT |   |
| 21 | 36929000 | 36964000 | 36933794 | 36933801 | - | 76.7  | TCACAGCT | * |
| 21 | 36929000 | 36964000 | 36933809 | 36933816 | - | 57.5  | TGACACCC | * |
| 21 | 36929000 | 36964000 | 36933865 | 36933872 | - | 56.4  | AGACACCT | * |
| 21 | 36929000 | 36964000 | 36933892 | 36933899 | - | 52.6  | TCTCAGCT | * |
| 21 | 36929000 | 36964000 | 36933942 | 36933949 | + | 61.7  | TCACACTC | * |
| 21 | 36929000 | 36964000 | 36934043 | 36934050 | + | 55.2  | TGTCACCT | * |
| 21 | 36929000 | 36964000 | 36934098 | 36934105 | + | 59.2  | TCACACAC |   |
| 21 | 36929000 | 36964000 | 36934102 | 36934109 | + | 53.9  | ACACAGCT |   |
| 21 | 36929000 | 36964000 | 36935434 | 36935441 | + | 59.0  | TCACACAA |   |
| 21 | 36929000 | 36964000 | 36935595 | 36935602 | + | 53.2  | ACTCACCT |   |
| 21 | 36929000 | 36964000 | 36935961 | 36935968 | - | 54.3  | TCTCACCC | * |
| 21 | 36929000 | 36964000 | 36936350 | 36936357 | - | 60.5  | ACACACTT |   |
| 21 | 36929000 | 36964000 | 36937790 | 36937797 | - | 59.2  | TCACACAC |   |
| 21 | 36929000 | 36964000 | 36937865 | 36937872 | + | 76.7  | TCACAGCT |   |
| 21 | 36929000 | 36964000 | 36938150 | 36938157 | - | 80.9  | TCACACAT |   |
| 21 | 36929000 | 36964000 | 36938997 | 36939004 | - | 55.4  | TCACATTT |   |
| 21 | 36929000 | 36964000 | 36939117 | 36939124 | + | 54.8  | TCACAGCA |   |
| 21 | 36929000 | 36964000 | 36939198 | 36939205 | + | 56.8  | TCTCACAT |   |
| 21 | 36929000 | 36964000 | 36939200 | 36939207 | + | 72.0  | TCACATCT |   |
| 21 | 36929000 | 36964000 | 36939244 | 36939251 | - | 59.3  | TCTCACTT |   |
| 21 | 36929000 | 36964000 | 36939778 | 36939785 | - | 54.8  | TCACAGCA |   |
| 21 | 36929000 | 36964000 | 36940197 | 36940204 | - | 53.2  | ACTCACCT |   |
| 21 | 36929000 | 36964000 | 36940461 | 36940468 | - | 54.3  | TCTCACCC |   |
| 21 | 36929000 | 36964000 | 36941676 | 36941683 | - | 100.0 | TCACACCT |   |
| 21 | 36929000 | 36964000 | 36942141 | 36942148 | + | 50.2  | TCACATCA |   |
| 21 | 36929000 | 36964000 | 36942463 | 36942470 | - | 53.9  | ACACAGCT |   |
| 21 | 36929000 | 36964000 | 36942743 | 36942750 | + | 59.0  | TCACACAA |   |
| 21 | 36929000 | 36964000 | 36942871 | 36942878 | - | 83.3  | TCACACTT |   |
| 21 | 36929000 | 36964000 | 36942925 | 36942932 | + | 78.1  | TCACACCA |   |
| 21 | 36929000 | 36964000 | 36943284 | 36943291 | + | 57.3  | TGACACCA |   |
| 21 | 36929000 | 36964000 | 36944187 | 36944194 | + | 59.3  | TCTCACTT |   |
| 21 | 36929000 | 36964000 | 36944209 | 36944216 | + | 50.2  | TCACATCA |   |
| 21 | 36929000 | 36964000 | 36944228 | 36944235 | - | 77.2  | ACACACCT |   |
| 21 | 36929000 | 36964000 | 36944621 | 36944628 | - | 57.5  | TGACACCC |   |
| 21 | 36929000 | 36964000 | 36944796 | 36944803 | - | 59.0  | TCACACAA |   |
| 21 | 36929000 | 36964000 | 36944990 | 36944997 | + | 59.0  | TCACACAA |   |
| 21 | 36929000 | 36964000 | 36945026 | 36945033 | + | 57.5  | TCACAGAT |   |
| 21 | 36929000 | 36964000 | 36945206 | 36945213 | - | 53.9  | ACACAGCT |   |

|    |          |          |          |          |   |       |          |   |
|----|----------|----------|----------|----------|---|-------|----------|---|
| 21 | 36929000 | 36964000 | 36945410 | 36945417 | + | 59.3  | TCTCACTT |   |
| 21 | 36929000 | 36964000 | 36945450 | 36945457 | - | 77.2  | ACACACCT |   |
| 21 | 36929000 | 36964000 | 36945454 | 36945461 | - | 59.2  | TCACACAC |   |
| 21 | 36929000 | 36964000 | 36945461 | 36945468 | + | 56.4  | AGACACCT |   |
| 21 | 36929000 | 36964000 | 36946596 | 36946603 | + | 72.0  | TCACATCT |   |
| 21 | 36929000 | 36964000 | 36947037 | 36947044 | + | 59.2  | TCACACAC |   |
| 21 | 36929000 | 36964000 | 36947500 | 36947507 | + | 77.2  | ACACACCT |   |
| 21 | 36929000 | 36964000 | 36947552 | 36947559 | - | 77.2  | ACACACCT |   |
| 21 | 36929000 | 36964000 | 36947567 | 36947574 | - | 54.3  | TCTCACCC |   |
| 21 | 36929000 | 36964000 | 36947574 | 36947581 | - | 53.9  | ACACAGCT |   |
| 21 | 36929000 | 36964000 | 36948050 | 36948057 | + | 61.5  | TCACACTA |   |
| 21 | 36929000 | 36964000 | 36948126 | 36948133 | + | 50.2  | TCACATCA |   |
| 21 | 36929000 | 36964000 | 36948548 | 36948555 | + | 61.5  | TCACACTA |   |
| 21 | 36929000 | 36964000 | 36948712 | 36948719 | - | 61.5  | TCACACTA |   |
| 21 | 36929000 | 36964000 | 36948837 | 36948844 | + | 61.7  | TCACACTC |   |
| 21 | 36929000 | 36964000 | 36948971 | 36948978 | - | 77.2  | ACACACCT |   |
| 21 | 36929000 | 36964000 | 36949300 | 36949307 | + | 58.1  | ACACACAT |   |
| 21 | 36929000 | 36964000 | 36949320 | 36949327 | + | 59.2  | TCACACAC |   |
| 21 | 36929000 | 36964000 | 36949760 | 36949767 | - | 55.5  | ACACACCC |   |
| 21 | 36929000 | 36964000 | 36951248 | 36951255 | + | 61.7  | TCACACTC |   |
| 21 | 36929000 | 36964000 | 36951646 | 36951653 | + | 100.0 | TCACACCT | * |
| 21 | 36929000 | 36964000 | 36952060 | 36952067 | + | 54.8  | TCACAGCA |   |
| 21 | 36929000 | 36964000 | 36952725 | 36952732 | - | 77.2  | ACACACCT | * |
| 21 | 36929000 | 36964000 | 36952731 | 36952738 | - | 59.2  | TCACACAC | * |
| 21 | 36929000 | 36964000 | 36952736 | 36952743 | + | 57.3  | TGACACCA | * |
| 21 | 36929000 | 36964000 | 36952748 | 36952755 | + | 78.3  | TCACACCC | * |
| 21 | 36929000 | 36964000 | 36952762 | 36952769 | + | 60.5  | ACACACTT | * |
| 21 | 36929000 | 36964000 | 36952829 | 36952836 | + | 83.3  | TCACACTT | * |
| 21 | 36929000 | 36964000 | 36952921 | 36952928 | - | 52.9  | TCACATAT |   |
| 21 | 36929000 | 36964000 | 36953072 | 36953079 | - | 77.2  | ACACACCT |   |
| 21 | 36929000 | 36964000 | 36953184 | 36953191 | - | 56.4  | AGACACCT |   |
| 21 | 36929000 | 36964000 | 36953906 | 36953913 | + | 77.2  | ACACACCT |   |
| 21 | 36929000 | 36964000 | 36953949 | 36953956 | - | 58.1  | ACACACAT |   |
| 21 | 36929000 | 36964000 | 36953951 | 36953958 | - | 59.2  | TCACACAC |   |
| 21 | 36929000 | 36964000 | 36954424 | 36954431 | + | 51.3  | TGACATCT |   |
| 21 | 36929000 | 36964000 | 36954474 | 36954481 | + | 55.9  | TGACAGCT |   |
| 21 | 36929000 | 36964000 | 36954658 | 36954665 | - | 77.2  | ACACACCT |   |
| 21 | 36929000 | 36964000 | 36956034 | 36956041 | + | 59.2  | TCACACAC |   |
| 21 | 36929000 | 36964000 | 36956128 | 36956135 | - | 53.2  | ACTCACCT |   |
| 21 | 36929000 | 36964000 | 36956161 | 36956168 | + | 60.5  | ACACACTT |   |
| 21 | 36929000 | 36964000 | 36956187 | 36956194 | + | 56.4  | AGACACCT |   |
| 21 | 36929000 | 36964000 | 36957174 | 36957181 | + | 52.9  | TCACATAT |   |
| 21 | 36929000 | 36964000 | 36958185 | 36958192 | - | 83.3  | TCACACTT | * |
| 21 | 36929000 | 36964000 | 36958252 | 36958259 | - | 60.5  | ACACACTT | * |



|    |          |          |          |          |   |       |          |   |
|----|----------|----------|----------|----------|---|-------|----------|---|
| 21 | 36929000 | 36964000 | 36958278 | 36958285 | - | 57.3  | TGACACCA | * |
| 21 | 36929000 | 36964000 | 36958283 | 36958290 | + | 59.2  | TCACACAC | * |
| 21 | 36929000 | 36964000 | 36958289 | 36958296 | + | 77.2  | ACACACCT | * |
| 21 | 36929000 | 36964000 | 36960955 | 36960962 | - | 77.2  | ACACACCT |   |
| 21 | 36929000 | 36964000 | 36961411 | 36961418 | + | 61.7  | TCACACTC |   |
| 21 | 36929000 | 36964000 | 36961583 | 36961590 | - | 54.8  | TCACAGCA |   |
| 21 | 36929000 | 36964000 | 36962019 | 36962026 | - | 80.9  | TCACACAT |   |
| 21 | 36929000 | 36964000 | 36962880 | 36962887 | - | 60.5  | ACACACTT |   |
| 21 | 36929000 | 36964000 | 36962890 | 36962897 | - | 58.1  | ACACACAT |   |
| 21 | 36929000 | 36964000 | 36962959 | 36962966 | + | 52.6  | TCTCAGCT |   |
| 21 | 36929000 | 36964000 | 36963846 | 36963853 | + | 61.7  | TCACACTC |   |
| 21 | 36929000 | 36964000 | 36963954 | 36963961 | - | 61.7  | TCACACTC |   |
| 25 | 11374000 | 11409000 | 11374093 | 11374100 | - | 59.0  | TCACACAA |   |
| 25 | 11374000 | 11409000 | 11374140 | 11374147 | + | 62.5  | TGACACTT |   |
| 25 | 11374000 | 11409000 | 11375064 | 11375071 | - | 59.3  | TCTCACTT |   |
| 25 | 11374000 | 11409000 | 11375672 | 11375679 | - | 55.4  | TCACATTT |   |
| 25 | 11374000 | 11409000 | 11375998 | 11376005 | - | 50.2  | TCACATCA |   |
| 25 | 11374000 | 11409000 | 11378246 | 11378253 | + | 60.5  | ACACACTT |   |
| 25 | 11374000 | 11409000 | 11378812 | 11378819 | - | 60.1  | TGACACAT |   |
| 25 | 11374000 | 11409000 | 11379037 | 11379044 | + | 59.2  | TCACACAC |   |
| 25 | 11374000 | 11409000 | 11379713 | 11379720 | - | 83.3  | TCACACTT |   |
| 25 | 11374000 | 11409000 | 11379774 | 11379781 | - | 80.9  | TCACACAT |   |
| 25 | 11374000 | 11409000 | 11380313 | 11380320 | + | 50.2  | TCACATCA |   |
| 25 | 11374000 | 11409000 | 11380634 | 11380641 | - | 57.3  | TGACACCA |   |
| 25 | 11374000 | 11409000 | 11380818 | 11380825 | - | 59.3  | TCTCACTT |   |
| 25 | 11374000 | 11409000 | 11382630 | 11382637 | - | 55.4  | TCACATTT |   |
| 25 | 11374000 | 11409000 | 11382846 | 11382853 | - | 72.0  | TCACATCT |   |
| 25 | 11374000 | 11409000 | 11383368 | 11383375 | - | 100.0 | TCACACCT |   |
| 25 | 11374000 | 11409000 | 11383457 | 11383464 | + | 50.2  | TCACATCA |   |
| 25 | 11374000 | 11409000 | 11385436 | 11385443 | - | 83.3  | TCACACTT |   |
| 25 | 11374000 | 11409000 | 11385805 | 11385812 | - | 59.0  | TCACACAA |   |
| 25 | 11374000 | 11409000 | 11386512 | 11386519 | - | 60.5  | ACACACTT |   |
| 25 | 11374000 | 11409000 | 11386528 | 11386535 | - | 62.5  | TGACACTT |   |
| 25 | 11374000 | 11409000 | 11386649 | 11386656 | + | 60.0  | TCACAGTT |   |
| 25 | 11374000 | 11409000 | 11386671 | 11386678 | - | 55.4  | TCACATTT |   |
| 25 | 11374000 | 11409000 | 11386742 | 11386749 | + | 58.1  | ACACACAT |   |
| 25 | 11374000 | 11409000 | 11387069 | 11387076 | + | 57.3  | TGACACCA | * |
| 25 | 11374000 | 11409000 | 11387985 | 11387992 | - | 79.2  | TGACACCT |   |
| 25 | 11374000 | 11409000 | 11388062 | 11388069 | + | 52.9  | TCACATAT |   |
| 25 | 11374000 | 11409000 | 11389022 | 11389029 | - | 58.1  | ACACACAT |   |
| 25 | 11374000 | 11409000 | 11389642 | 11389649 | + | 79.2  | TGACACCT | * |
| 25 | 11374000 | 11409000 | 11389837 | 11389844 | - | 59.0  | TCACACAA | * |
| 25 | 11374000 | 11409000 | 11390563 | 11390570 | + | 60.1  | TGACACAT |   |
| 25 | 11374000 | 11409000 | 11391722 | 11391729 | - | 55.0  | TCACAGCC |   |

|    |          |          |          |          |   |       |          |   |
|----|----------|----------|----------|----------|---|-------|----------|---|
| 25 | 11374000 | 11409000 | 11391931 | 11391938 | - | 54.8  | TCACAGCA |   |
| 25 | 11374000 | 11409000 | 11392669 | 11392676 | + | 54.1  | TCTCACCA |   |
| 25 | 11374000 | 11409000 | 11392703 | 11392710 | + | 58.1  | ACACACAT |   |
| 25 | 11374000 | 11409000 | 11392743 | 11392750 | + | 77.2  | ACACACCT |   |
| 25 | 11374000 | 11409000 | 11393160 | 11393167 | + | 52.6  | TCTCAGCT | * |
| 25 | 11374000 | 11409000 | 11393507 | 11393514 | - | 100.0 | TCACACCT | * |
| 25 | 11374000 | 11409000 | 11393517 | 11393524 | + | 79.2  | TGACACCT | * |
| 25 | 11374000 | 11409000 | 11393635 | 11393642 | - | 80.9  | TCACACAT | * |
| 25 | 11374000 | 11409000 | 11394510 | 11394517 | - | 58.1  | ACACACAT |   |
| 25 | 11374000 | 11409000 | 11395279 | 11395286 | - | 54.8  | TCACAGCA |   |
| 25 | 11374000 | 11409000 | 11395641 | 11395648 | + | 54.8  | TCACAGCA |   |
| 25 | 11374000 | 11409000 | 11395820 | 11395827 | - | 59.0  | TCACACAA |   |
| 25 | 11374000 | 11409000 | 11396018 | 11396025 | - | 58.1  | ACACACAT |   |
| 25 | 11374000 | 11409000 | 11396190 | 11396197 | - | 62.5  | TGACACTT |   |
| 25 | 11374000 | 11409000 | 11396398 | 11396405 | - | 58.1  | ACACACAT | * |
| 25 | 11374000 | 11409000 | 11396538 | 11396545 | - | 55.3  | ACACACCA | * |
| 25 | 11374000 | 11409000 | 11396560 | 11396567 | + | 60.0  | TCACAGTT | * |
| 25 | 11374000 | 11409000 | 11396597 | 11396604 | + | 55.0  | TCACAGCC | * |
| 25 | 11374000 | 11409000 | 11396687 | 11396694 | + | 78.1  | TCACACCA | * |
| 25 | 11374000 | 11409000 | 11396742 | 11396749 | + | 59.0  | TCACACAA | * |
| 25 | 11374000 | 11409000 | 11396922 | 11396929 | + | 78.3  | TCACACCC |   |
| 25 | 11374000 | 11409000 | 11397110 | 11397117 | + | 76.7  | TCACAGCT |   |
| 25 | 11374000 | 11409000 | 11397612 | 11397619 | - | 61.5  | TCACACTA |   |
| 25 | 11374000 | 11409000 | 11398176 | 11398183 | + | 60.5  | ACACACTT |   |
| 25 | 11374000 | 11409000 | 11398539 | 11398546 | - | 58.1  | ACACACAT | * |
| 25 | 11374000 | 11409000 | 11398607 | 11398614 | - | 59.2  | TCACACAC | * |
| 25 | 11374000 | 11409000 | 11399755 | 11399762 | - | 54.3  | TCTCACCC |   |
| 25 | 11374000 | 11409000 | 11400617 | 11400624 | + | 56.4  | AGACACCT | * |
| 25 | 11374000 | 11409000 | 11400705 | 11400712 | + | 54.3  | TCTCACCC | * |
| 25 | 11374000 | 11409000 | 11400798 | 11400805 | + | 55.0  | TCACAGCC | * |
| 25 | 11374000 | 11409000 | 11400979 | 11400986 | - | 61.7  | TCACACTC | * |
| 25 | 11374000 | 11409000 | 11401466 | 11401473 | - | 60.1  | TGACACAT |   |
| 25 | 11374000 | 11409000 | 11401705 | 11401712 | - | 50.2  | TCACATCA |   |
| 25 | 11374000 | 11409000 | 11401801 | 11401808 | + | 61.5  | TCACACTA |   |
| 25 | 11374000 | 11409000 | 11402307 | 11402314 | + | 55.3  | ACACACCA |   |
| 25 | 11374000 | 11409000 | 11402726 | 11402733 | + | 57.3  | TGACACCA |   |
| 25 | 11374000 | 11409000 | 11402813 | 11402820 | + | 55.4  | TCACATTT |   |
| 25 | 11374000 | 11409000 | 11403108 | 11403115 | + | 55.4  | TCACATTT |   |
| 25 | 11374000 | 11409000 | 11403212 | 11403219 | - | 58.1  | ACACACAT |   |
| 25 | 11374000 | 11409000 | 11403214 | 11403221 | - | 59.2  | TCACACAC |   |
| 25 | 11374000 | 11409000 | 11404083 | 11404090 | + | 58.1  | ACACACAT |   |
| 25 | 11374000 | 11409000 | 11404479 | 11404486 | - | 54.3  | TCTCACCC |   |
| 25 | 11374000 | 11409000 | 11405325 | 11405332 | + | 55.5  | ACACACCC |   |
| 25 | 11374000 | 11409000 | 11405362 | 11405369 | + | 61.5  | TCACACTA |   |

|    |          |          |          |          |   |       |          |  |
|----|----------|----------|----------|----------|---|-------|----------|--|
| 25 | 11374000 | 11409000 | 11405827 | 11405834 | - | 100.0 | TCACACCT |  |
| 25 | 11374000 | 11409000 | 11406440 | 11406447 | - | 55.4  | TCACATTT |  |
| 25 | 11374000 | 11409000 | 11406938 | 11406945 | - | 57.3  | TGACACCA |  |

**Table S3. List of primers, antibodies and RNA probes**

| <b>Morpholino sequences</b> |                                                            |
|-----------------------------|------------------------------------------------------------|
| Ripply1                     | 5'-CATCGTCACTGTGTTTTTCGTTTTG-3'<br>(Kawamura et al., 2005) |
| Mesp-ba ATG                 | 5'-TCGGTTCTTGCTTGAGGTTTGCATG-3'<br>(Kawamura et al 2005)   |
| Mesp-bb ATG                 | 5'-CGTCCA TTCTGTGTGGTTGGAGA TT-3'                          |
| Mesp-ba splice              | 5'-TAACTTAACATACCTGGTACGGTGT-3'                            |
| Mesp-bb splice              | 5'-TTTAAAGCCTGTCTACACACCTGAT-3'                            |
| Standard control            | 5'-CCTCCTACCTCAGTTACAATTTATA-3'                            |
| p53 MO                      | 5'-GCGCCATTGCTTTGCAAGAATTG-3'<br>(Robu et al., 2007)       |

| <b>Primary antibodies</b> |                   |
|---------------------------|-------------------|
| Pax7, MF20, F59, cMyc     | 1:10, DSHB        |
| Mef2                      | 1:100, Santa Cruz |
| b-cat                     | 1:1000, Sigma     |
| Tbx6                      | 1:250             |

| <b>Secondary antibodies</b> |                   |
|-----------------------------|-------------------|
| Alexa-conjugated            | 1:800, Invitrogen |

| <b>RNA probes</b>   |                         |
|---------------------|-------------------------|
| <i>meox</i>         | (Neyt et al., 2000)     |
| <i>mesp-ba</i>      | (Sawada et al., 2000)   |
| <i>mesp-bb</i>      | (Cutty et al., 2012)    |
| <i>myf5</i>         | (Coutelle et al., 2001) |
| <i>myoD</i>         | (Weinberg et al., 1996) |
| <i>pax3, pax7</i>   | (Seo et al., 1998)      |
| <i>rippy1, tbx6</i> | (Kawahara et al., 2005) |
